# Supplementary material
Source: PubMed Central journal article supplement (PMC2614746)
Supplement: 0804774105_0804774105SI.pdf [file 0804774105_0804774105SI.pdf]

# Supporting Information

Calosci *et al.* 10.1073/pnas.0804774105

Table S1. Parameters obtained from global fitting of all kinetic folding data on pseudo-wild-type and mutant PSD-95 PDZ3 using shared  $m$  values

| Protein region | Mutant    | $k_f, s^{-1}$<br>D→TS1 | $k_{u1}, s^{-1}$<br>N→TS1 | $k_{u2}, s^{-1}$<br>N→TS2 |
|----------------|-----------|------------------------|---------------------------|---------------------------|
|                | Pseudo-WT | 20 ± 0.9               | 0.032 ± 0.002             | 6.2 ± 0.9                 |
| $\beta 1$      | I314V     | 17 ± 0.8               | 0.013 ± 0.001             | 2.4 ± 0.4                 |
| $\beta 1$      | I316A     | 3.8 ± 1.2              | 2.3 ± 0.1                 | 110 ± 15                  |
| Loop           | L323A     | 37 ± 3                 | 1.4 ± 0.1                 | 44 ± 7                    |
| $\beta 2$      | F325A     | 1.0 ± 1.7              | 6.6 ± 0.4                 | 98 ± 15                   |
| $\beta 2$      | I327V     | 13 ± 0.6               | 0.11 ± 0.008              | 14 ± 2                    |
| $\beta 2$      | V328A     | 17 ± 0.9               | 0.046 ± 0.004             | 4.6 ± 0.7                 |
| $\beta 3$      | I336V     | 20 ± 0.9               | 0.068 ± 0.005             | 6.6 ± 1.0                 |
| $\beta 3$      | I336A     | 20 ± 1                 | 0.31 ± 0.02               | 18 ± 3                    |
| $\beta 3$      | I338A     | 12 ± 1                 | 0.76 ± 0.05               | 36 ± 5                    |
| $\beta 3$      | F340A     | 11 ± 0.5               | 0.021 ± 0.002             | 3.3 ± 0.6                 |
| $\beta 3$      | I341V     | 23 ± 1                 | 0.028 ± 0.002             | 5.9 ± 0.9                 |
| $\beta 3$      | I341A     | 25 ± 2                 | 0.57 ± 0.04               | 29 ± 4                    |
| $\alpha 1$     | P346G     | 22 ± 1                 | 0.34 ± 0.02               | 32 ± 5                    |
| $\alpha 1$     | A347G     | 22 ± 1                 | 0.33 ± 0.02               | 37 ± 5                    |
| Loop           | L353A     | 11 ± 1                 | 0.80 ± 0.05               | 41 ± 6                    |
| $\beta 4$      | I359V     | 11 ± 0.5               | 0.088 ± 0.006             | 12 ± 2                    |
| $\beta 4$      | V362A     | 3.6 ± 0.2              | 0.098 ± 0.006             | 9.0 ± 1.3                 |
| $\alpha 2$     | H372A     | 140 ± 7.0              | 0.024 ± 0.002             | 3.7 ± 0.7                 |
| $\alpha 2$     | E373A     | 18 ± 0.9               | 0.031 ± 0.002             | 5.8 ± 0.9                 |
| $\alpha 2$     | E373G     | 12 ± 0.6               | 0.056 ± 0.004             | 9.4 ± 1.4                 |
| $\alpha 2$     | A375G     | 5.4 ± 0.3              | 0.045 ± 0.003             | 5.8 ± 0.8                 |
| $\alpha 2$     | A376G     | 5.7 ± 0.4              | 0.088 ± 0.006             | 8.9 ± 1.3                 |
| $\alpha 2$     | I377A     | 23 ± 1                 | 0.037 ± 0.003             | 6.6 ± 1.0                 |
| $\alpha 2$     | I377G     | 6.0 ± 0.3              | 0.074 ± 0.005             | 10 ± 2                    |
| $\alpha 2$     | A378G     | 5.0 ± 0.5              | 0.47 ± 0.03               | 32 ± 4                    |
| $\alpha 2$     | L379A     | 4.3 ± 0.2              | 0.090 ± 0.006             | 9.9 ± 1.4                 |
| $\alpha 2$     | K380A     | 42 ± 2                 | 0.025 ± 0.002             | 4.6 ± 0.7                 |
| $\alpha 2$     | K380G     | 17 ± 0.8               | 0.066 ± 0.005             | 7.8 ± 1.2                 |
| Turn           | A382G     | 9.3 ± 0.6              | 0.11 ± 0.008              | 14 ± 2                    |
| $\beta 6$      | V386A     | 12 ± 0.6               | 0.55 ± 0.03               | 28 ± 4                    |
| $\beta 6$      | I388V     | 8.5 ± 0.4              | 0.16 ± 0.01               | 18 ± 3                    |
| $\beta 6$      | Y392A     | 13 ± 0.9               | 0.27 ± 0.02               | 6.9 ± 1.1                 |

The fitted  $m$  values are as follows:  $m_{D+1} = 0.84 \pm 0.01$ ,  $m_{N+1} = 0.66 \pm 0.01$ , and  $m_p = 0.50 \pm 0.01$  kcal·mol<sup>-1</sup>·M<sup>-1</sup>. Errors are from the global fitting to the sum of Eqs. 1 and 3.

\* $k_{u2} = k_u/K_p$ .
